# Supplementary material for: A highly selective fluorescent chemosensor for cyanide anions based on a chalcone derivative in the presence of iron(iii) ions, and its capacity for living cell imaging in mixed aqueous systems
Source: Royal Society of Chemistry journal article supplement (doi:10.1039/c5nj01043h), 2015-01-01
Supplement: c5nj01043h1.pdf [file c5nj01043h1.pdf]

**A high selectivity fluorescent chemosensor for  
cyanide anion based on a chalcone derivatives in  
the present of iron (III) ion, and its capacity for live  
cell imaging in mixed aqueous system**

Wen Yang<sup>a</sup>, Zhongqin Cheng<sup>b</sup>, Yunlong Xu<sup>a</sup>, Jie Shao<sup>a</sup>, Weiqun Zhou<sup>a\*</sup>, Juan Xie<sup>a</sup>,  
Mengying Li<sup>b\*</sup>

<sup>a</sup>*School of Chemistry & Chemical Engineering and Material Science, Soochow University, 199  
Ren'ai Road, Suzhou, People's Republic of China, 215123*

<sup>b</sup>*School of Biology and Basic Medical Sciences, Soochow University, 199 Ren'ai Road, Suzhou,  
People's Republic of China, 215123*

*E-mail: [wqzhou@suda.edu.cn](mailto:wqzhou@suda.edu.cn)*

**Supplementary data**

|                                                         |   |
|---------------------------------------------------------|---|
| Table of Content.....                                   | 1 |
| 1. Figure S1 The 2D-NMR (HSQC) of <b>1</b> .....        | 2 |
| 2. Figure S2 The HRMS of <b>1-Fe<sup>3+</sup></b> ..... | 3 |

---

\* Corresponding author, Tel: 86-0512-65884827 (Zhou); 86-0512-65880421 (Li).  
E-mail: [wqzhou@suda.edu.cn](mailto:wqzhou@suda.edu.cn) (Weiqun Zhou); [lmysz@126.com](mailto:lmysz@126.com) (Mengying, Li).  
Postal address: Soochow University, 199 Ren'ai Road, Suzhou, P. R. China, 215123.

1. **Figure S1**

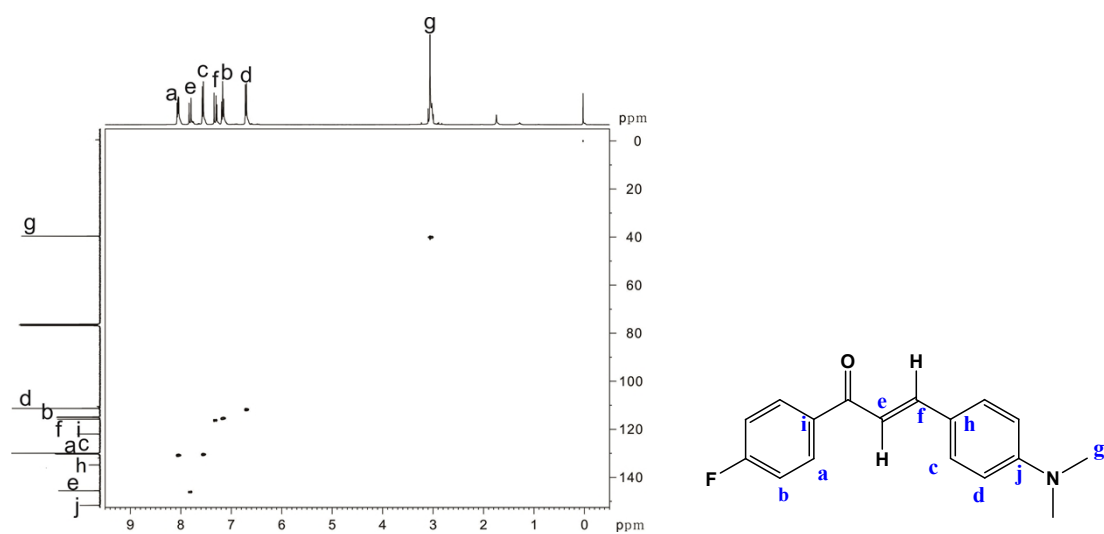

**Figure S1** The 2D-NMR (HSQC) of **1** (0.309M) in  $\text{CD}_3\text{CN-}d_6$ .

2. **Figure S2**

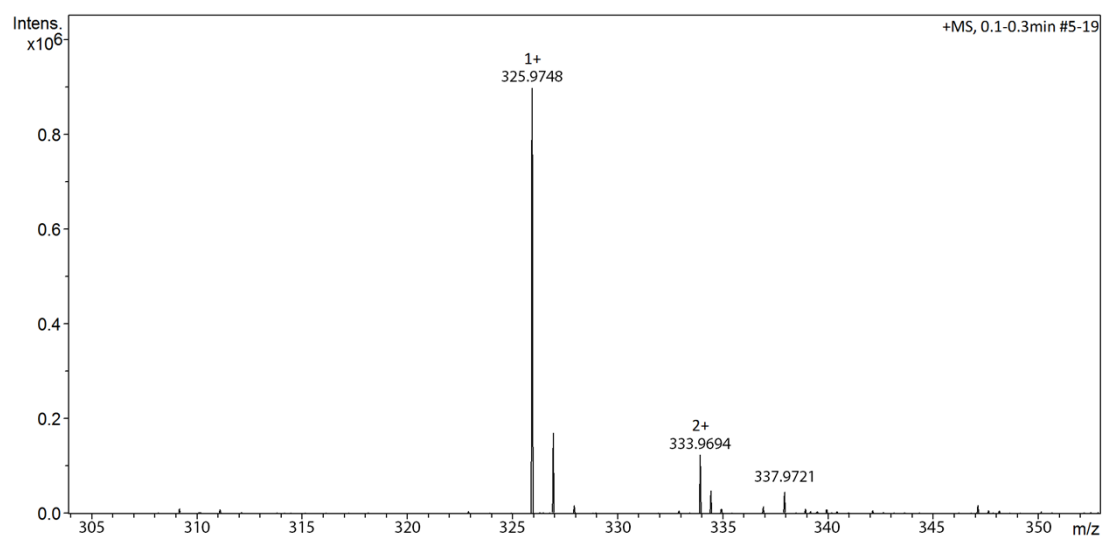

**Figure S2** The HRMS of **1-Fe<sup>3+</sup>**.
